# Supplementary material for: Unique Features of Mycobacterium abscessus Biofilms Formed in Synthetic Cystic Fibrosis Medium
Source: Front Microbiol. 2021 Oct 29;12:743126. doi: 10.3389/fmicb.2021.743126 (PMC8586431; doi:10.3389/fmicb.2021.743126)
Supplement: Supplementary file 5 [file Table_4.xlsx]

## Sheet: B2vsP1
Table S4A. Results of gene Ontology analyses B2vsP1 (DAVID; FDR < 0.05, FE >2)
KEGG Pathway
Category	Term	Count	List total	P-value	Fold Enrichment	FDR	Genes
KEGG_PATHWAY	mtu00920:Sulfur metabolism	6	45	0.00138023	6.53968	0.0181877	MAB_4447, MAB_0406c, MAB_1653, MAB_1655, MAB_0451c, MAB_1654
KEGG_PATHWAY	mtu02010:ABC transporters	17	45	1.30856e-08	5.11988	4.57995e-07	MAB_0747, MAB_4447, MAB_1653, MAB_1655, MAB_4852c, MAB_2176, MAB_1697, MAB_1700, MAB_1699, MAB_1698, MAB_1713, MAB_1693, MAB_1694, MAB_0748, MAB_2235, MAB_1654, MAB_4514c
KEGG_PATHWAY	mtu02020:Two-component system	9	45	0.00155894	3.74545	0.0181877	MAB_3891c, MAB_4852c, MAB_4309c, MAB_3340, MAB_4048c, MAB_3339, MAB_1077, MAB_2938, MAB_3252c
KEGG_PATHWAY	mtu00061:Fatty acid biosynthesis	8	81	5.10683e-05	6.78189	0.00064346	MAB_1865, MAB_0598, MAB_0754c, MAB_4443, MAB_1876c, MAB_1237, MAB_1219, MAB_3643
KEGG_PATHWAY	mtu00071:Fatty acid degradation	12	81	0.00136436	2.93447	0.00955053	MAB_1865, MAB_3649, MAB_1187c, MAB_4169, MAB_1864, MAB_4442c, MAB_3481, MAB_1073c, MAB_3124, MAB_3487, MAB_0316, MAB_4588c
KEGG_PATHWAY	mtu00280:Valine, leucine and isoleucine degradation	18	81	5.23616e-07	3.87947	1.09959e-05	MAB_1187c, MAB_3649, MAB_4169, MAB_1864, MAB_4442c, MAB_1876c, MAB_2711c, MAB_1189c, MAB_3481, MAB_1073c, MAB_1071c, MAB_2712c, MAB_3124, MAB_3643, MAB_3631, MAB_3487, MAB_0316, MAB_4588c
KEGG_PATHWAY	mtu00410:beta-Alanine metabolism	11	81	0.000359095	3.68096	0.00323186	MAB_0542, MAB_3649, MAB_1187c, MAB_1189c, MAB_3481, MAB_1073c, MAB_3124, MAB_3487, MAB_0316, MAB_0541, MAB_4588c
KEGG_PATHWAY	mtu00630:Glyoxylate and dicarboxylate metabolism	10	81	0.00294728	3.10148	0.0168799	MAB_4169, MAB_2711c, MAB_4442c, MAB_1876c, MAB_4095c, MAB_1071c, MAB_2712c, MAB_3631, MAB_3643, MAB_2730
KEGG_PATHWAY	mtu00640:Propanoate metabolism	17	81	4.3927e-07	4.15717	1.09959e-05	MAB_1187c, MAB_4169, MAB_4442c, MAB_1876c, MAB_2711c, MAB_1189c, MAB_3481, MAB_1073c, MAB_1071c, MAB_2712c, MAB_3124, MAB_4376c, MAB_3631, MAB_3487, MAB_3643, MAB_0316, MAB_4588c
KEGG_PATHWAY	mtu01040:Biosynthesis of unsaturated fatty acids	5	81	0.0049465	6.35802	0.0259691	MAB_0598, MAB_0754c, MAB_4443, MAB_1237, MAB_1219
KEGG_PATHWAY	mtu01200:Carbon metabolism	22	81	3.18758e-05	2.54321	0.000502043	MAB_1574, MAB_1250c, MAB_2779c, MAB_4169, MAB_4422, MAB_4254c, MAB_4442c, MAB_1876c, MAB_4095c, MAB_2711c, MAB_1189c, MAB_3481, MAB_1073c, MAB_2712c, MAB_1071c, MAB_3388c, MAB_4376c, MAB_3631, MAB_3643, MAB_3487, MAB_4423, MAB_2730
KEGG_PATHWAY	mtu01212:Fatty acid metabolism	18	81	6.40232e-08	4.40171	4.03346e-06	MAB_1865, MAB_1187c, MAB_0598, MAB_0754c, MAB_4443, MAB_4169, MAB_1864, MAB_4442c, MAB_1876c, MAB_3481, MAB_1073c, MAB_1237, MAB_1219, MAB_3643, MAB_3124, MAB_3487, MAB_0316, MAB_4588c
Biological Process
Category	Term	Count	List total	P-value	Fold Enrichment	FDR	Genes
GOTERM_BP_DIRECT	GO:0006351~transcription, DNA-templated	21	112	0.000204	2.42878	0.0259641	MAB_1379c, MAB_3891c, MAB_0409, MAB_2602c, MAB_0483c, MAB_4542c, MAB_0673, MAB_2447c, MAB_2581, MAB_2565c, MAB_2933c, MAB_2415c, MAB_4046c, MAB_0487, MAB_2832c, MAB_3300c, MAB_3339, MAB_4139, MAB_4541, MAB_3295, MAB_2604c
Molecular Function
Category	Term	Count	List total	P-value	Fold Enrichment	FDR	Genes
GOTERM_MF_DIRECT	GO:0015419~sulfate transmembrane-transporting ATPase activity	4	105	0.000375693	21.3429	0.0062526	MAB_4447, MAB_1653, MAB_1655, MAB_1654
GOTERM_MF_DIRECT	GO:0009055~electron carrier activity	14	133	0.000141107	3.3875	0.026387	MAB_0593c, MAB_3618c, MAB_1188c, MAB_0088c, MAB_3123, MAB_3363c, MAB_3838c, MAB_3481, MAB_1073c, MAB_1327, MAB_3549c, MAB_3487, MAB_4423, MAB_0583c
Cellular Component
Category	Term	Count	List total	P-value	Fold Enrichment	FDR	Genes
GOTERM_CC_DIRECT	GO:0009317~acetyl-CoA carboxylase complex	4	160	0.00269696	12.3058	0.0287676	MAB_0181, MAB_1876c, MAB_3631, MAB_3643

## Sheet: B5vsP2
Table S4B. Results of gene Ontology analyses B5vsP2 (DAVID; FDR < 0.05, FE >2)
KEGG Pathway
Category	Term	Count	List total	P-value	Fold Enrichment	FDR	Genes
KEGG_PATHWAY	mtu03010:Ribosome	25	143	2.49318e-07	2.95197	2.14414e-05	MAB_3798c, MAB_1143c, MAB_3819c, MAB_3805c, MAB_3224c, MAB_3820c, MAB_3795c, MAB_3806c, MAB_3850c, MAB_3796c, MAB_1549c, MAB_3851c, MAB_3807c, MAB_3797c, MAB_3751c, MAB_3814c, MAB_3752c, MAB_3793c, MAB_3821c, MAB_3196c, MAB_1611, MAB_1610, MAB_3280, MAB_3794c, MAB_1634c
							MAB_3798c, MAB_1143c, MAB_3819c, MAB_3805c, MAB_3224c, MAB_3820c, MAB_3795c, MAB_3806c, MAB_3850c, MAB_3796c, MAB_1549c, MAB_3851c, MAB_3807c, MAB_3797c, MAB_3751c, MAB_3814c, MAB_3752c, MAB_3793c, MAB_3821c, MAB_3196c, MAB_1611, MAB_1610, MAB_3280, MAB_3794c, MAB_1634c
Biological Process
Category	Term	Count	List total	P-value	Fold Enrichment	FDR	Genes
GOTERM_BP_DIRECT	GO:0006412~translation	30	263	5.23529e-11	3.73742	1.29835e-08	MAB_3798c, MAB_1143c, MAB_3342c, MAB_3819c, MAB_3805c, MAB_3224c, MAB_3820c, MAB_3795c, MAB_3806c, MAB_3850c, MAB_3796c, MAB_3851c, MAB_1549c, MAB_3807c, MAB_1310, MAB_3797c, MAB_3751c, MAB_1142c, MAB_3814c, MAB_3752c, MAB_3131c, MAB_3793c, MAB_3821c, MAB_3196c, MAB_3341c, MAB_1611, MAB_1610, MAB_3280, MAB_3794c, MAB_1634c
Molecular Function
Category	Term	Count	List total	P-value	Fold Enrichment	FDR	Genes
GOTERM_MF_DIRECT	GO:0003735~structural constituent of ribosome	25	285	4.93944e-09	3.68875	1.2398e-06	MAB_3798c, MAB_1143c, MAB_3819c, MAB_3805c, MAB_3224c, MAB_3820c, MAB_3795c, MAB_3806c, MAB_3850c, MAB_3796c, MAB_3851c, MAB_1549c, MAB_3807c, MAB_3797c, MAB_3751c, MAB_3814c, MAB_3752c, MAB_3793c, MAB_3821c, MAB_3196c, MAB_1611, MAB_1610, MAB_3280, MAB_3794c, MAB_1634c
GOTERM_MF_DIRECT	GO:0019843~rRNA binding	15	285	6.17331e-05	3.2915	0.00774751	MAB_3796c, MAB_3798c, MAB_3851c, MAB_3819c, MAB_3807c, MAB_3797c, MAB_3805c, MAB_3814c, MAB_3820c, MAB_3806c, MAB_3850c, MAB_3795c, MAB_3793c, MAB_1610, MAB_1634c
Cellular Component
Category	Term	Count	List total	P-value	Fold Enrichment	FDR	Genes
GOTERM_CC_DIRECT	GO:0005840~ribosome	19	277	1.0578e-06	3.58284	3.59651e-05	MAB_3796c, MAB_3798c, MAB_1143c, MAB_3851c, MAB_1549c, MAB_3819c, MAB_3797c, MAB_3805c, MAB_3751c, MAB_3224c, MAB_3752c, MAB_3820c, MAB_3806c, MAB_3821c, MAB_1611, MAB_1612, MAB_1610, MAB_3280, MAB_1634c
GOTERM_CC_DIRECT	GO:0022625~cytosolic large ribosomal subunit	12	277	4.89547e-05	4.09053	0.000832229	MAB_3796c, MAB_1611, MAB_3807c, MAB_3797c, MAB_3805c, MAB_3224c, MAB_3752c, MAB_3806c, MAB_3793c, MAB_1610, MAB_3794c, MAB_3280

## Sheet: B2vsP1_B5vsP2
Table S4C. Results of Gene Ontology analyses from common genes up and down-regulated in B2vsP1 and B5vsP2 (DAVID; FDR < 0.05, FE >2)
KEGG Pathway
Category	Term	Count	List total	P-value	Fold Enrichment	FDR	Genes
KEGG_PATHWAY	mtu00190:Oxidative phosphorylation	12	48	2.20416e-06	5.59783	0.000110208	MAB_2146, MAB_2139, MAB_2141, MAB_2137, MAB_2144, MAB_2140, MAB_2143, MAB_2142, MAB_2147, MAB_2138, MAB_2145, MAB_2136
KEGG_PATHWAY	mtu01053:Biosynthesis of siderophore group nonribosomal peptides	6	48	1.75816e-05	14.3056	0.00043954	MAB_2120c, MAB_2124, MAB_2249, MAB_2245, MAB_2123, MAB_2122
Biological Process
Category	Term	Count	List total	P-value	Fold Enrichment	FDR	Genes
GOTERM_BP_DIRECT	GO:0042773~ATP synthesis coupled electron transport	5	90	3.36149e-05	20.6296	0.00262196	MAB_2146, MAB_2144, MAB_2140, MAB_2147, MAB_2145
GOTERM_BP_DIRECT	GO:0006810~transport	10	90	0.000319639	4.34308	0.0124659	MAB_2226c, MAB_2137, MAB_2144, MAB_2379, MAB_2147, MAB_2136, MAB_2224c, MAB_2233c, MAB_2232c, MAB_4746
GOTERM_BP_DIRECT	GO:0055088~lipid homeostasis	7	90	0.00253968	4.81358	0.0495237	MAB_4336, MAB_3486, MAB_0595c, MAB_4538c, MAB_0594c, MAB_0597, MAB_1070c
GOTERM_BP_DIRECT	GO:0033539~fatty acid beta-oxidation using acyl-CoA dehydrogenase	7	90	0.00253968	4.81358	0.0495237	MAB_4336, MAB_3486, MAB_0595c, MAB_4538c, MAB_0594c, MAB_0597, MAB_1070c
Molecular Function
Category	Term	Count	List total	P-value	Fold Enrichment	FDR	Genes
GOTERM_MF_DIRECT	GO:0048038~quinone binding	11	86	4.04396e-12	20.7977	3.92264e-10	MAB_2146, MAB_2139, MAB_2141, MAB_2137, MAB_2144, MAB_2140, MAB_2142, MAB_2147, MAB_2138, MAB_2145, MAB_2136
GOTERM_MF_DIRECT	GO:0008137~NADH dehydrogenase (ubiquinone) activity	9	86	1.74883e-09	19.6342	8.48181e-08	MAB_2146, MAB_2139, MAB_2144, MAB_2140, MAB_2143, MAB_2147, MAB_2138, MAB_2145, MAB_2136
GOTERM_MF_DIRECT	GO:0003995~acyl-CoA dehydrogenase activity	7	86	0.00126142	5.51453	0.0284023	MAB_4336, MAB_3486, MAB_0595c, MAB_4538c, MAB_0594c, MAB_0597, MAB_1070c
GOTERM_MF_DIRECT	GO:0052890~oxidoreductase activity, acting on the CH-CH group of donors, with a flavin as acceptor	7	86	0.00126142	5.51453	0.0284023	MAB_4336, MAB_3486, MAB_0595c, MAB_4538c, MAB_0594c, MAB_0597, MAB_1070c
GOTERM_MF_DIRECT	GO:0000062~fatty-acyl-CoA binding	7	86	0.00146404	5.36549	0.0284023	MAB_4336, MAB_3486, MAB_0595c, MAB_4538c, MAB_0594c, MAB_0597, MAB_1070c
Cellular Component
Category	Term	Count	List total	P-value	Fold Enrichment	FDR	Genes
NO COMMON GENE in B2vsP1 and B5vsP2
